# Supplementary material for: Structural basis for active-site probes targeting Staphylococcus aureus serine hydrolase virulence factors
Source: bioRxiv or medRxiv preprint supplement (doi:10.1101/2020.04.21.054437), 2020-05-09
Supplement: Supplementary file [file media-1.pdf]

## Supplemental informaton

# Structural basis for active-site probes targeting *Staphylococcus aureus* serine hydrolase virulence factors

## Authors

Matthias Fellner<sup>1\*</sup>, Christian S. Lentz<sup>2,3</sup>, Sam A. Jamieson<sup>1</sup>, Jodi L. Brewster<sup>1</sup>, Linhai Chen<sup>2,4</sup>, Matthew Bogyo<sup>2</sup>, Peter D. Mace<sup>1</sup>

<sup>1</sup>Biochemistry, University of Otago, New Zealand

<sup>2</sup>Department of Pathology, Stanford University, USA

<sup>3</sup>Centre for New Antibacterial Strategies (CANS) and Research Group for Host-Microbe Interactions, Department of Medical Biology, UiT – The Arctic University of Norway, Norway

<sup>4</sup>National Center for Drug Screening, State Key Laboratory of Drug Research, Shanghai Institute of Materia Medica, Chinese Academy of Sciences, China

\*Corresponding Author and Lead Contact: [matthias.fellner@otago.ac.nz](mailto:matthias.fellner@otago.ac.nz)

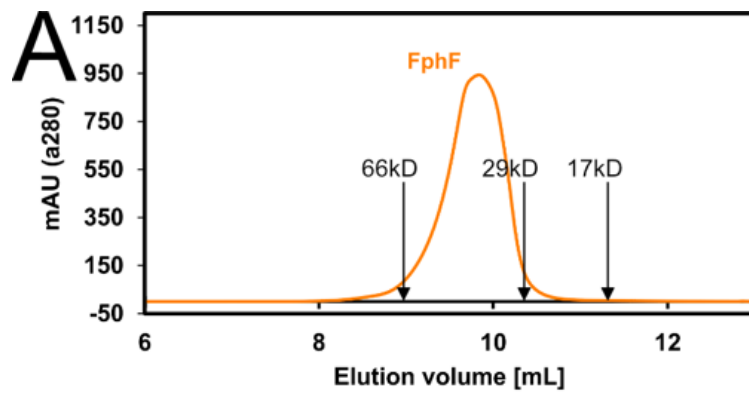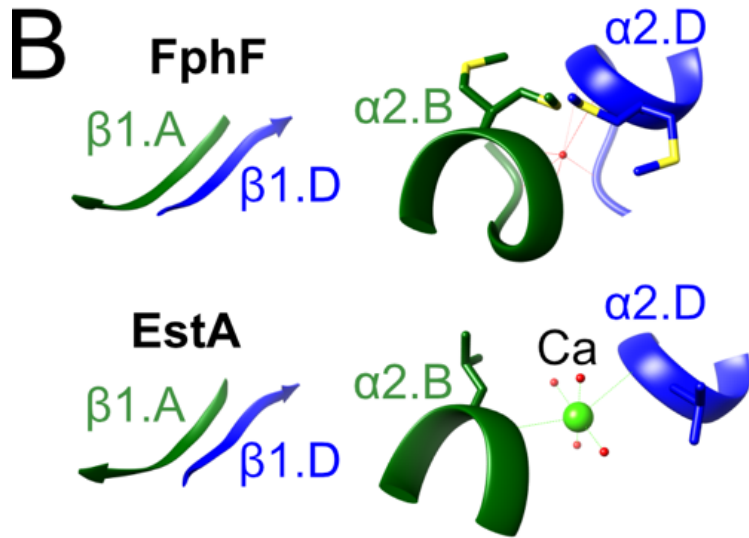

**Figure S1: Dimer of FphF.** A) A280 Superdex 75 chromatograph comparison of 58 kDa FphF dimer (29 kDa monomer) compared to molecular weight standard proteins bovine serum albumin 66 kDa; carbonic anhydrase 29 kDa and diubiquitin 17 kDa. C) Comparison of dimer interfaces between FphF and EstA (PDB ID 2UZ0). At the  $\alpha 2$  interface FphF with alternate conformations of Met56 and chelated water compared to EstA with an interfacing Calcium ion.

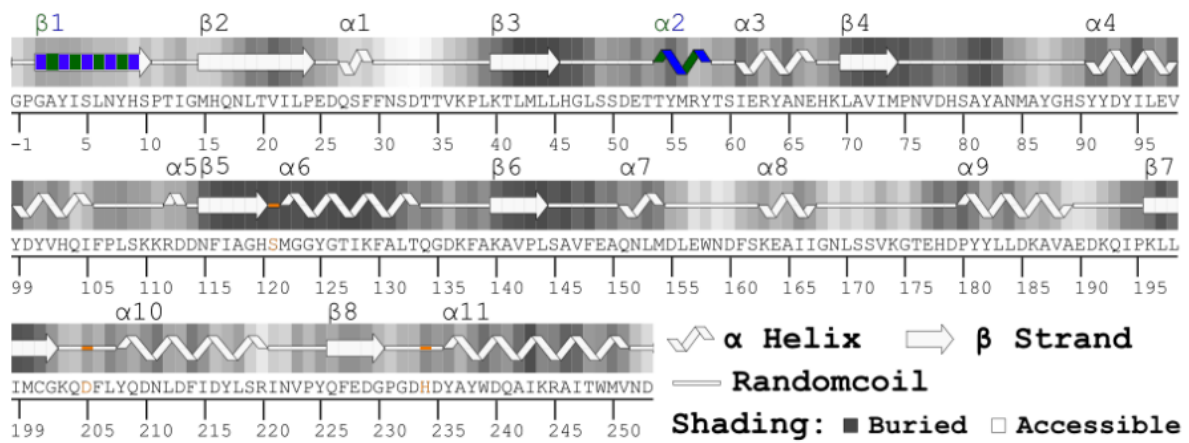

**Figure S2: Sequence and corresponding secondary structure of FphF.** Active site triad in orange. Two different dimer interfaces within the tetramer indicated by blue and dark green coloring of  $\beta 1$ - $\beta 1$  and  $\alpha 2$ - $\alpha 2$ .

```

FphF S. aureus MAYISLNY----- 8
FphB S. aureus --MRKKWSTLAFGFLVAAAHIRIKEKRSVKSYMLEQGIRLSRAKRRFMYKEEAMKALEK 58
EstA S. pneumoniae MAVMKIEY----- 8
ESD H. sapiens MALKQISSNKCFGGGLQKVFEH----- 21

FphF S. aureus -----HSPTIGMHQNLTVILPEDQSFNSDITVKPLKTLMLLHGLSSD 51
FphB S. aureus MAPQTAGEYEGTNYQFKMPVKVDKHFGSTVYTVND-----KQDKHQVRVLYAHGGAWFQ 112
EstA S. pneumoniae -----YSQVLDMEWGVNVLYPDANRVEE--PECEDI PVLYLLHGMSGN 49
ESD H. sapiens -----DSVELNCKMKFAVYLP-----PKAETGKCPALYWLSGLTCT 57
          . . . * . * .

FphF S. aureus ETTYMRYTSIERYANEHKLAVIMPVNDHS-----AYANM-----AYG 88
FphB S. aureus DPLKIHFEFIDELAETLNKAVIMPVYPKI-----PHQDYQAT 149
EstA S. pneumoniae HNSWLKRTNVERLLRGTNLIVVMPNTSNG-----WYTDT-----QYG 86
ESD H. sapiens EQNFISKSGYHQSAEHLVVIAPDTS PRGCNIKGEDES WDFGTGAGFYVDATEDPWKTN 117
          . : .. *: *

FphF S. aureus HSYDYDILEVYDYV-HQIFP-LSKKRDDNFIAGHS MGGYGTIKFALTQGDKF----AKAV 142
FphB S. aureus YVLF--EKLYHDLL-----NQVADSKQIVVMGDSAGGQIALSFAQLLKEKHIVQPGHIV 201
EstA S. pneumoniae FDYYTALAEELPQVLKRFFPNMTSKREKTFIAGLSMGGYGCFKLALTTN-RF----SHAA 141
ESD H. sapiens YRMYSYVTEELPQLINANFPV---DPQRMSIFGHS MGGHGALICALKNPGKY----KSVS 170
          . : : : . . : * * * * : * :.

FphF S. aureus PLSAVFEAQNLM DLEW NDFSKEA IIGNLSSVK---GTEHD---PYLLDKAVAEDKQIP 195
FphB S. aureus LISPVLDATMQHPEI PDYLK KDP MVGVDG SVFLAEQWAGDTP LDNYKVSP-INGDL DGLG 260
EstA S. pneumoniae SFGALS FQNFSPESQNLGSPAYWRGVFGEIR---DWTTS---PYSL-ESLAKKSDKKT 193
ESD H. sapiens AFAPICN---PVLCPWG---KKA FSGYLGTDQ--SKWKA-----YDATHLVKSYPGSQL 216
          :: . . * . *

FphF S. aureus KLLIMCGKQD-FLYQDNLD---FIDYLSRINVPYQFEDGPGD---HDYAYWDQAI-KRAI 247
FphB S. aureus RITLTVGTKE-VLYPDALN---LSQLLSAKGIEHDFI--PGYYQFHIYPVFPPIPERRRFL 314
EstA S. pneumoniae KLWAWCGEQD-FLYEANNL---AVKNLKKLGFDV TYSHSAGT---HEWYYWEKQL-EVFL 245
ESD H. sapiens DILIDQ GKDDQFLLDGQLLPDNFIAACTEKKIPVVFRLQEGY--DHSYYFIATFI-TDHI 273
          : * . : . * . . : * * :

FphF S. aureus TWMVND----- 253
FphB S. aureus YQVKNIIN----- 322
EstA S. pneumoniae TTLPIDFKLEERLT 259
ESD H. sapiens RHHAKYLNA----- 282

```

**Figure S3: Sequence alignment.** Alignment of FphF (UniProt ID Q2FU Y3); FphB (Q2FV90); EstA (A0A0H2UNZ8) and ESD (P10768). Active site triad highlighted.

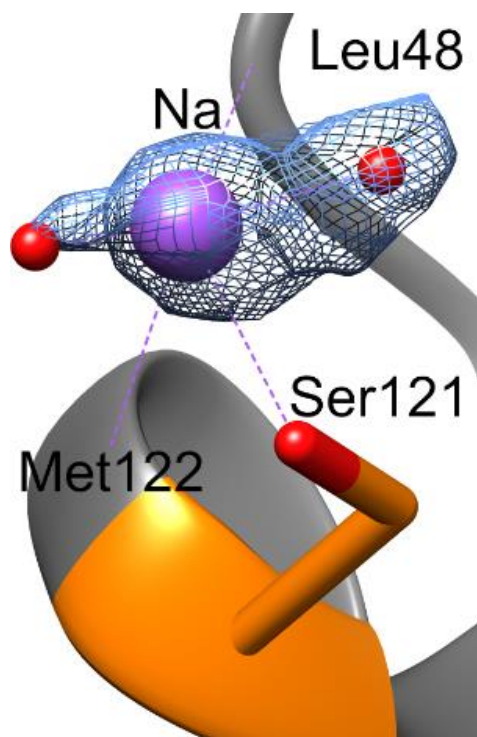

**Figure S4: Sodium binding in the FphF apo-protein.** The  $2FO-FC$  maps for sodium atom (purple sphere) and chelating water molecules (red sphere) are shown as blue meshes at  $1 \sigma$  (PDB ID 6VH9). Sodium coordination to Ser121, backbone of Met122 and backbone of Leu48 illustrated as purple dashes.

**Table S1: Crystallization conditions of FphF.**

Highest diffracting crystal in Å. Crystal form 2 showed significant anisotropy and translational noncrystallographic symmetry.

| (Å)                      | Compound 1                                            | Compound 2                                                                | Compound 3                                                                   |
|--------------------------|-------------------------------------------------------|---------------------------------------------------------------------------|------------------------------------------------------------------------------|
| <b>Crystal form 1*</b>   |                                                       |                                                                           |                                                                              |
| 1.7                      | 2.8 M Sodium acetate                                  |                                                                           |                                                                              |
| 1.9                      | 0.2 M Trisodium citrate                               | 0.1 M Bis-tris propane pH 6.5                                             | 20% w/v PEG 3350                                                             |
| 1.9                      | 0.8 M Sodium formate                                  | 0.1 M Tris pH 7.5 or HEPES pH 7.0                                         | 10% w/v PEG 8000<br>10% w/v PEG 1000                                         |
| 2.2                      | 0.7-0.8 M Sodium formate                              | 0.1 M Tris pH 7.5 or HEPES pH 7.0                                         | 25% w/v PEG MME 2000                                                         |
| 2.2                      | 1.5 M Li <sub>2</sub> SO <sub>4</sub>                 | 0.1 M Tris pH 8.0 or 8.5                                                  |                                                                              |
| ~4                       | 2.0 M (NH <sub>4</sub> ) <sub>2</sub> SO <sub>4</sub> | 0.1 M Sodium cacodylate pH 6.5                                            | 0.2 M NaCl                                                                   |
| <b>Crystal form 2**</b>  |                                                       |                                                                           |                                                                              |
| 2.1                      | 40-75% Tacsimate                                      | 0-0.1 M Bis-tris propane pH 6.5-8.0                                       | 0-8% w/v Polypropylene glycol                                                |
| 2.6                      | 0.8 M Sodium formate                                  | 0-0.1 M Tris pH 7.5                                                       | 25% w/v PEG MME 2000                                                         |
| 2.7                      | 0.8-1 M Sodium formate                                | 0-0.1 M Sodium cacodylate pH 6.8 or HEPES pH 7.0                          | 7-10% w/v PEG 8000<br>7-10% w/v PEG 1000                                     |
| 2.9                      | 0.2 M Trisodium citrate                               | 0.1 M Bis-tris propane pH 6.5                                             | 20% w/v PEG 3350                                                             |
| 3.0                      | 1.4 M Disodium malonate                               | 0.1 M Bis-tris propane pH 7.0                                             |                                                                              |
| ~8                       | 0.2 M Ammonium acetate                                | 0.1 M HEPES pH 7.5                                                        | 25% w/v PEG 3350                                                             |
| <b>Crystal form 3***</b> |                                                       |                                                                           |                                                                              |
| 3.1                      | 2.7-2.8 M Sodium acetate                              | 0-0.1 M Sodium cacodylate pH 6.8 M or Tris pH 7.5                         |                                                                              |
| 3.2                      | 0.8 M Sodium formate                                  | 0-0.1 M Tris pH 7.5 or HEPES pH 7.0                                       | 10% w/v PEG 8000<br>10% w/v PEG 1000                                         |
| 3.3                      | 0.7-0.9 M Sodium formate                              | 0.1 M Sodium cacodylate pH 6.4 or Tris pH 7.5 or 8.5                      | 25% w/v PEG MME 2000                                                         |
| 3.6                      | 60% Tacsimate                                         | 0-0.1 M Bis-tris propane pH 7.0                                           | 0-0.1 M (NH <sub>4</sub> ) <sub>2</sub> SO <sub>4</sub> or Disodium malonate |
| 3.8                      | 1.4-2.4 M Disodium malonate                           | 0-0.1 M Bis-tris propane pH 7.0                                           |                                                                              |
| 3.8                      | 1-1.4 M Trisodium citrate                             | 0.1 M Bis-tris propane pH 7.0 or Sodium cacodylate pH 6.5 or HEPES pH 7.0 |                                                                              |
| ~4                       | 0.2 M Trisodium citrate                               | 0.1 M Bis-tris propane pH 6.5                                             | 20% w/v PEG 3350                                                             |
| ~5                       | 0.8 M Sodium formate                                  | 0.1 M Tris pH 7.5                                                         | 25% w/v PEG MME 2000                                                         |
| ~7                       | 0.2 M Ammonium acetate                                | 0.1 M HEPES pH 7.5                                                        | 25% w/v PEG 3350                                                             |
| ~9                       | 1.8 M Li <sub>2</sub> SO <sub>4</sub>                 | 0.1 M Tris pH 8.8                                                         |                                                                              |

\*Crystal form 1: P6<sub>1</sub> 2 2; a, b, c (Å); α, β, γ (°) = ~87, 87, 454; 90, 90, 120; 4 chains

\*\*Crystal form 2: P6<sub>2</sub> 2 2; a, b, c (Å); α, β, γ (°) = ~88, 88, 222; 90, 90, 120; 2 chains

\*\*\*Crystal form 3: P6<sub>4</sub> 2 2; a, b, c (Å); α, β, γ (°) = ~88, 88, 110; 90, 90, 120; 1 chain

**Table S2: FphF data collection and processing**

Values for the outer shell are given in parentheses.

|                               | apo                           | KT129 bound                   | KT130 bound                   | heptyl acyl bound             |
|-------------------------------|-------------------------------|-------------------------------|-------------------------------|-------------------------------|
| Diffraction source            | Australian<br>synchrotron MX2 | Australian<br>synchrotron MX2 | Australian<br>synchrotron MX1 | Australian<br>synchrotron MX1 |
| Wavelength (Å)                | 0.954                         | 0.954                         | 0.954                         | 0.954                         |
| Detector                      | DECTRIS EIGER<br>X 16M        | DECTRIS EIGER<br>X 16M        | DECTRIS EIGER<br>X 9M         | DECTRIS EIGER<br>X 9M         |
| Space group                   | P 6 <sub>1</sub> 2 2          | P 6 <sub>1</sub> 2 2          | P 6 <sub>1</sub> 2 2          | P 6 <sub>1</sub> 2 2          |
| a, b, c (Å)                   | 87.1, 87.2, 453.6             | 87.2, 87.2, 455.2             | 87.1, 87.1, 454.9             | 87.0 87.0 454.7               |
| $\alpha, \beta, \gamma$ (°)   | 90, 90, 120                   | 90, 90, 120                   | 90, 90, 120                   | 90, 90, 120                   |
| Resolution range<br>(Å)       | 49.16 – 1.71<br>(1.74 – 1.71) | 49.28 – 1.98<br>(2.02 – 1.98) | 49.24 – 1.94<br>(1.98 – 1.94) | 49.19 – 2.89<br>(3.07 – 2.89) |
| Total No. of<br>reflections   | 3,064,967<br>(144,842)        | 1,980,193<br>(107,296)        | 3,049,489<br>(145,969)        | 217,394<br>(26,252)           |
| No. of unique<br>reflections  | 112,281<br>(5,332)            | 73,040<br>(4,307)             | 77,616<br>(4,466)             | 23,922<br>(3,641)             |
| Completeness (%)              | 99.9 (97.8)                   | 99.9 (98.5)                   | 100.0 (99.5)                  | 99.4 (97.4)                   |
| Redundancy                    | 27.3 (27.2)                   | 27.1 (24.9)                   | 39.3 (32.7)                   | 9.1 (7.2)                     |
| $\langle I/\sigma(I) \rangle$ | 16.5 (1.5)                    | 16.7 (1.5)                    | 23.1 (2.2)                    | 7.7 (1.6)                     |
| CC <sub>1/2</sub>             | 0.999 (0.581)                 | 0.999 (0.711)                 | 1.000 (0.804)                 | 0.988 (0.524)                 |
| $R_{\text{merge}}$            | 0.128 (3.155)                 | 0.151 (2.676)                 | 0.152 (1.957)                 | 0.223 (1.137)                 |
| $R_{\text{p.i.m.}}$           | 0.025 (0.605)                 | 0.029 (0.535)                 | 0.024 (0.342)                 | 0.069 (0.380)                 |

**Table S3: FphF structure solution and refinement**

Values for the outer shell are given in parentheses.

|                                          | apo                           | KT129                         | KT130                         | heptyl acyl                   |
|------------------------------------------|-------------------------------|-------------------------------|-------------------------------|-------------------------------|
|                                          |                               | bound                         | bound                         | bound                         |
| Resolution range (Å)                     | 43.57 – 1.71<br>(1.73 – 1.71) | 49.28 – 1.98<br>(2.00 – 1.98) | 49.24 – 1.94<br>(1.96 – 1.94) | 49.19 – 2.89<br>(2.96 – 2.89) |
| Final $R_{\text{cryst}}$                 | 0.177 (0.316)                 | 0.176 (0.301)                 | 0.168 (0.272)                 | 0.225 (0.305)                 |
| Final $R_{\text{free}}$                  | 0.201 (0.342)                 | 0.213 (0.333)                 | 0.209 (0.332)                 | 0.261 (0.272)                 |
| Protein residues                         | 1020                          | 1020                          | 1020                          | 1020                          |
| Ligands                                  | 4 (Na)                        | 4 (KT129)                     | 4 (KT130)                     | 4 (heptyl acyl)               |
| Water                                    | 457                           | 258                           | 499                           | 17                            |
| R.m.s. deviations                        |                               |                               |                               |                               |
| Bonds (Å)                                | 0.009                         | 0.010                         | 0.007                         | 0.007                         |
| Angles (°)                               | 1.190                         | 1.399                         | 0.948                         | 0.947                         |
| Average $B$ factors<br>(Å <sup>2</sup> ) | 39.5                          | 46.9                          | 38.0                          | 43.9                          |
| Ligands                                  | 42.4                          | 56.0                          | 46.0                          | 42.4                          |
| Water                                    | 45.0                          | 48.3                          | 40.9                          | 36.0                          |
| Ramachandran plot                        |                               |                               |                               |                               |
| Most favored (%)                         | 96.2                          | 96.3                          | 96.7                          | 96.2                          |
| Outlier (%)                              | 0                             | 0                             | 0                             | 0                             |
